# Supplementary material
Source: HighWire-hosted journal article supplement (http://www.jneurosci.org/highwire/filestream/598306/field_highwire_adjunct_files/4/Supplemental_S1_table.pdf)
Supplement: Supplemental_S1_table.pdf [file Supplemental_S1_table.pdf]

| Case-Number | age | gender | Diagnosis                                                                            | Dementia | Braak-stage | CERAD-score | A $\beta$ -phase | CAA-stage | Material                 | PMI   |
|-------------|-----|--------|--------------------------------------------------------------------------------------|----------|-------------|-------------|------------------|-----------|--------------------------|-------|
| BN1         | 69  | f      | Mastocytosis, arterial hypertension                                                  | 0        | 0           | 0           | 0                | 0         | Paraffin embedded tissue | 12-24 |
| BN2         | 62  | m      | Liver dysfunction                                                                    | 0        | 0           | 0           | 0                | 0         | Paraffin embedded tissue | 24-48 |
| BN3         | 67  | m      | cardiomyopathy                                                                       | 0        | 1           | 0           | 1                | 1         | Paraffin embedded tissue | 12-24 |
| BN4         | 63  | m      | Carcinoma of the lung, pathologic fracture of the right femur, arterial hypertension | 0        | 0           | 0           | 0                | 0         | Paraffin embedded tissue | 12-24 |
| BN5         | 66  | f      | Pneumonia                                                                            | 0        | 0           | 0           | 0                | 0         | Paraffin embedded tissue | 24-48 |
| SWE22       | 60  | m      | myocardial infarction                                                                | 0        | 0           | 0           | 0                | 0         | frozen tissue            | 27    |
| SWE28       | 73  | f      | cardial insufficiency, arterial hypertension                                         | 0        | 0           | 0           | 0                | 0         | frozen tissue            | 31    |
| SWE38       | 68  | m      | kidney dysfunction                                                                   | 0        | 0           | 0           | 0                | 0         | frozen tissue            | 26    |
| SWE56       | 62  | m      | GI bleeding, hip fracture                                                            | 0        | 0           | 0           | 0                | 0         | frozen tissue            | 26    |
| SWE63       | 67  | m      | Carcinoma of the lung                                                                | 0        | 0           | 0           | 0                | 0         | frozen tissue            | 20    |
| SWE64       | 90  | m      | pneumonia                                                                            | 0        | 0           | 0           | 0                | 0         | frozen tissue            | 24    |
| SWE70       | 91  | f      | cardiomyopathy                                                                       | 0        | 1           | 0           | 0                | 1         | frozen tissue            | 20    |
| SWE71       | 91  | m      | cardial insufficiency, anemia                                                        | 0        | 1           | 0           | 0                | 0         | frozen tissue            | 18    |
| SWE72       | 78  | m      | Hip fracture, cardiac infarct                                                        | 0        | 0           | 0           | 0                | 0         | frozen tissue            | 03    |
| SWE73       | 85  | f      | cardial insufficiency, Diabetes mellitus II                                          | 0        | 0           | 0           | 0                | 0         | frozen tissue            | 10    |
|             |     |        |                                                                                      |          |             |             |                  |           |                          |       |
| BN6         | 78  | m      | AD, kidney dysfunction, diabetes mellitus type II                                    | 1        | 4           | B           | 4                | 1         | Paraffin embedded tissue | 12-24 |
| BN7         | 80  | m      | AD, myocardial infarction, diabetes mellitus type II, arterial hypertension          | 1        | 3           | C           | 5                | 2         | Paraffin embedded tissue | 48-72 |
| BN8         | 83  | m      | AD, Pneumonia                                                                        | 1        | 5           | C           | 4                | 2         | Paraffin embedded tissue | 12-24 |
| BN9         | 83  | m      | AD, pneumonia, colo-rectal carcinoma                                                 | 1        | 4           | C           | 5                | 2         | Paraffin embedded tissue | 12-24 |
| BN11        | 81  | f      | AD, pneumonia, myocardial infarction, diabetes mellitus type II                      | 1        | 5           | B           | 4                | 1         | Paraffin embedded tissue | 24-48 |
| BN12        | 89  | f      | AD, cardiac failure, renal failure, sepsis                                           | 1        | 5           | C           | 5                | 2         | Paraffin embedded tissue | 12-24 |
| BN13        | 88  | m      | AD, pneumonia, cardiac failure                                                       | 1        | 4           | C           | 5                | 2         | Paraffin embedded tissue | 12-24 |
| SWE19       | 81  | m      | AD, cardiopulmonary insufficiency                                                    | 1        | 4           | B           | 3                | 1         | frozen tissue            | 25    |
| SWE20       | 74  | m      | AD, Pneumonia                                                                        | 1        | 5           | C           | 4                | 2         | frozen tissue            | 29    |
| SWE35       | 91  | f      | AD, pneumonia, diabetes mellitus                                                     | 1        | 6           | C           | 4                | 2         | frozen tissue            | 20    |
| SWE45       | 78  | f      | AD cardio-pulmonary insufficiency                                                    | 1        | 5           | C           | 4                | 2         | frozen tissue            | 26    |
| SWE51       | 80  | f      | AD, pneumonia, diabetes mellitus type II                                             | 1        | 4           | B           | 3                | 1         | frozen tissue            | 20    |
| SWE57       | 83  | f      | AD myocardial infarction                                                             | 1        | 5           | C           | 4                | 2         | frozen tissue            | 30    |
| SWE58       | 80  | f      | AD cardio-pulmonary dysfunction                                                      | 1        | 4           | B           | 3                | 1         | frozen tissue            | 18    |
| SWE62       | 75  | m      | AD pulmonary embolism                                                                | 1        | 4           | C           | 4                | 1         | frozen tissue            | 19    |
| SWE74       | 84  | m      | AD, myocardial insufficiency, Art hypertension                                       | 1        | 4           | B           | 3                | 1         | frozen tissue            | 16    |
| SWE78       | 93  | f      | AD Pneumonia                                                                         | 1        | 5           | C           | 4                | 2         | frozen tissue            | 29    |
